# Supplementary material for: Judicious design of lithium iron phosphate electrodes using poly(3,4-ethylenedioxythiophene) for high performance batteries
Source: Royal Society of Chemistry journal article supplement (doi:10.1039/c5ta03542b), 2015-01-01
Supplement: c5ta03542b1.pdf [file c5ta03542b1.pdf]

## Judicious design of lithium iron phosphate electrodes by poly(3,4-ethylenedioxythiophene) for high performance battery

Daniel Cíntora-Juárez,<sup>a</sup> Carlos Pérez-Vicente,<sup>a</sup> Samrana Kazim,<sup>b</sup> Shahzada Ahmad<sup>b\*</sup> and José Luis Tirado<sup>a</sup>

<sup>a</sup>Laboratorio de Química Inorgánica, Campus de Rabanales, Universidad de Córdoba, 14071, Spain.

<sup>b</sup>Abengoa Research, Abengoa, C/ Energía Solar nº 1, Campus Palmas Altas, Seville, 41014, Spain

Table S1 : Fitted hyperfine parameters for pristine and charged electrodes.

| Sample            | Polymer      | Assignment       | IS (mm/s) | QS (mm/s) | LW (mm/s) | Contribution (%) |
|-------------------|--------------|------------------|-----------|-----------|-----------|------------------|
| LFP pristine      | No           | Fe <sup>2+</sup> | 1.220(1)  | 2.96(1)   | 0.245(3)  | 93(2)            |
|                   |              | FeP              | 0.48(3)   | 0.79(4)   | 0.38(6)   | 7(2)             |
| LFP Charged       | No           | Fe <sup>2+</sup> | 1.22(3)   | 2.87(4)   | 0.33(6)   | 10(4)            |
|                   |              | Fe <sup>3+</sup> | 0.427(3)  | 1.526(7)  | 0.326(7)  | 85(4)            |
|                   |              | FeP              | 0.42(4)   | 0.78(5)   | 0.26(1)   | 5(4)             |
| bulk 1% Charged   | PEDOT:PSS    | Fe <sup>3+</sup> | 0.431(3)  | 1.534(7)  | 0.301(8)  | 92(1)            |
|                   |              | FeP              | 0.41(6)   | 0.9(1)    | 0.4(1)    | 8(1)             |
| EG-bulk1% Charged | EG-PEDOT:PSS | Fe <sup>3+</sup> | 0.426(3)  | 1.525(7)  | 0.285(7)  | 95(7)            |
|                   |              | FeP              | 0.48      | 0.7(1)    | 0.4(2)    | 5(7)             |

( IS: Isomer shift, QS: Quadrupolar splitting, LW: Line width.)

Table S2. Fitted binding energy (BE) of the Fe(2p) levels and satellite (Sat) signals for LFP-based electrodes.

| Sample               | BE 2p <sub>3/2</sub> (eV) | BE 2p <sub>1/2</sub> (eV) | BE Sat 1 (eV) | BE Sat 2 (eV) |
|----------------------|---------------------------|---------------------------|---------------|---------------|
| standard (pristine)  | 710.98                    | 724.64                    | 713.73        | 727.38        |
| bulk 1% (charged)    | 712.03                    | 725.75                    | 713.80        | 727.52        |
| EG-bulk (charged) 1% | 711.98                    | 725.80                    | 714.20        | 728.03        |

Table S3. Fitted peak positions for the S(2p<sub>3/2</sub>) level and calculated PSS / PEDOT ratios with associated standard deviation values. The binding energy (BE) of the corresponding S(2p<sub>1/2</sub>) signals was fixed 1.2 eV above the corresponding S(2p<sub>3/2</sub>) signals.

| Sample       | State        | BE S(2p <sub>3/2</sub> ) (eV) |        | PSS/PEDOT ratio |
|--------------|--------------|-------------------------------|--------|-----------------|
|              |              | PEDOT                         | PSS    |                 |
| PEDOT:PSS    | pristine     | 164.12                        | 168.46 | 3.70(2)         |
| PEDOT:PSS    | charged C/10 | 164.14                        | 168.57 | 3.3(2)          |
| bulk1%       | charged C/10 | 164.11                        | 168.44 | 1.74(3)         |
| EG-PEDOT:PSS | pristine     | 164.14                        | 168.38 | 2.90(2)         |
| EG-PEDOT:PSS | charged C/10 | 164.17                        | 168.47 | 2.43(3)         |
| EG-bulk1%    | charged C/10 | 164.13                        | 168.50 | 1.186(3)        |
